# Supplementary material for: Clinicopathological correlations of mesenteric fibrosis and evaluation of a novel biomarker for fibrosis detection in small bowel neuroendocrine neoplasms
Source: PubMed Central journal article supplement (PMC7054371; doi:10.1007/s12020-019-02107-4), 2019-10-09
Supplement: 12020_2019_2107_MOESM1_ESM.pdf [file 12020_2019_2107_MOESM1_ESM.pdf]

**Article Title: Clinicopathological correlations of mesenteric fibrosis and evaluation of a novel biomarker for fibrosis detection in small bowel neuroendocrine neoplasms**

**Journal: Endocrine**

**Authors: Faidon-Marios Laskaratos, Dalvinder Mandair, Andrew Hall, Sarah Alexander, Conrad von Stempel, Josephine Bretherton, TuVinh Luong, Jennifer Watkins, Olagunju Ogunbiyi, Krista Rombouts, Martyn Caplin, Christos Toumpanakis**

**Corresponding author: Dr Faidon-Marios Laskaratos MD, MSc, MRCP, Royal Free London NHS Foundation Trust, flaskaratos@gmail.com**

**Online Resource 1. Summary of demographic and clinical characteristics of patients enrolled in the biomarker assessment study**

|                                        | <b>Patients with midgut NETs who underwent surgery (n=20)</b> |
|----------------------------------------|---------------------------------------------------------------|
|                                        | <b>n (%)</b>                                                  |
| <b>Age (mean±SD)</b>                   | 63±10                                                         |
| <b>Sex</b>                             |                                                               |
| Male                                   | 13 (65%)                                                      |
| Female                                 | 7 (35%)                                                       |
| <b>Grade</b>                           |                                                               |
| 1                                      | 13 (65%)                                                      |
| 2                                      | 7 (35%)                                                       |
| <b>Extent of disease</b>               |                                                               |
| Localised                              | 2 (10%)                                                       |
| Locoregional                           | 5 (25%)                                                       |
| Metastatic                             | 13 (65%)                                                      |
| <b>Mesenteric mass</b>                 | 18 (90%)                                                      |
| <b>Liver metastases</b>                | 10 (50%)                                                      |
| <b>Distant extrahepatic metastases</b> | 5 (25%)                                                       |
| <b>Macroscopic mesenteric fibrosis</b> | 17 (85%)                                                      |
| <b>Medical therapy</b>                 |                                                               |
| Octreotide LAR                         | 6 (30%)                                                       |
| Lanreotide Autogel                     | 7 (35%)                                                       |
| <b>Surgical therapy</b>                |                                                               |
| Small bowel resection                  | 1 (5%)                                                        |
| Gastro-jejunal bypass                  | 1 (5%)                                                        |

|                          |          |
|--------------------------|----------|
| Right hemicolectomy (R0) | 10 (50%) |
| Right hemicolectomy (R1) | 8 (40%)  |
